# Supplementary material for: A negatively charged region within carboxy-terminal domain maintains proper CTCF DNA binding
Source: PubMed Central journal article supplement (PMC11667065; doi:10.1016/j.isci.2024.111452), 2024-11-22
Supplement: mmc1.pdf [file mmc1.pdf]

iScience, Volume 27

## **Supplemental information**

**A negatively charged region  
within carboxy-terminal domain  
maintains proper CTCF DNA binding**

**Lian Liu, Yuanxiao Tang, Yan Zhang, and Qiang Wu**

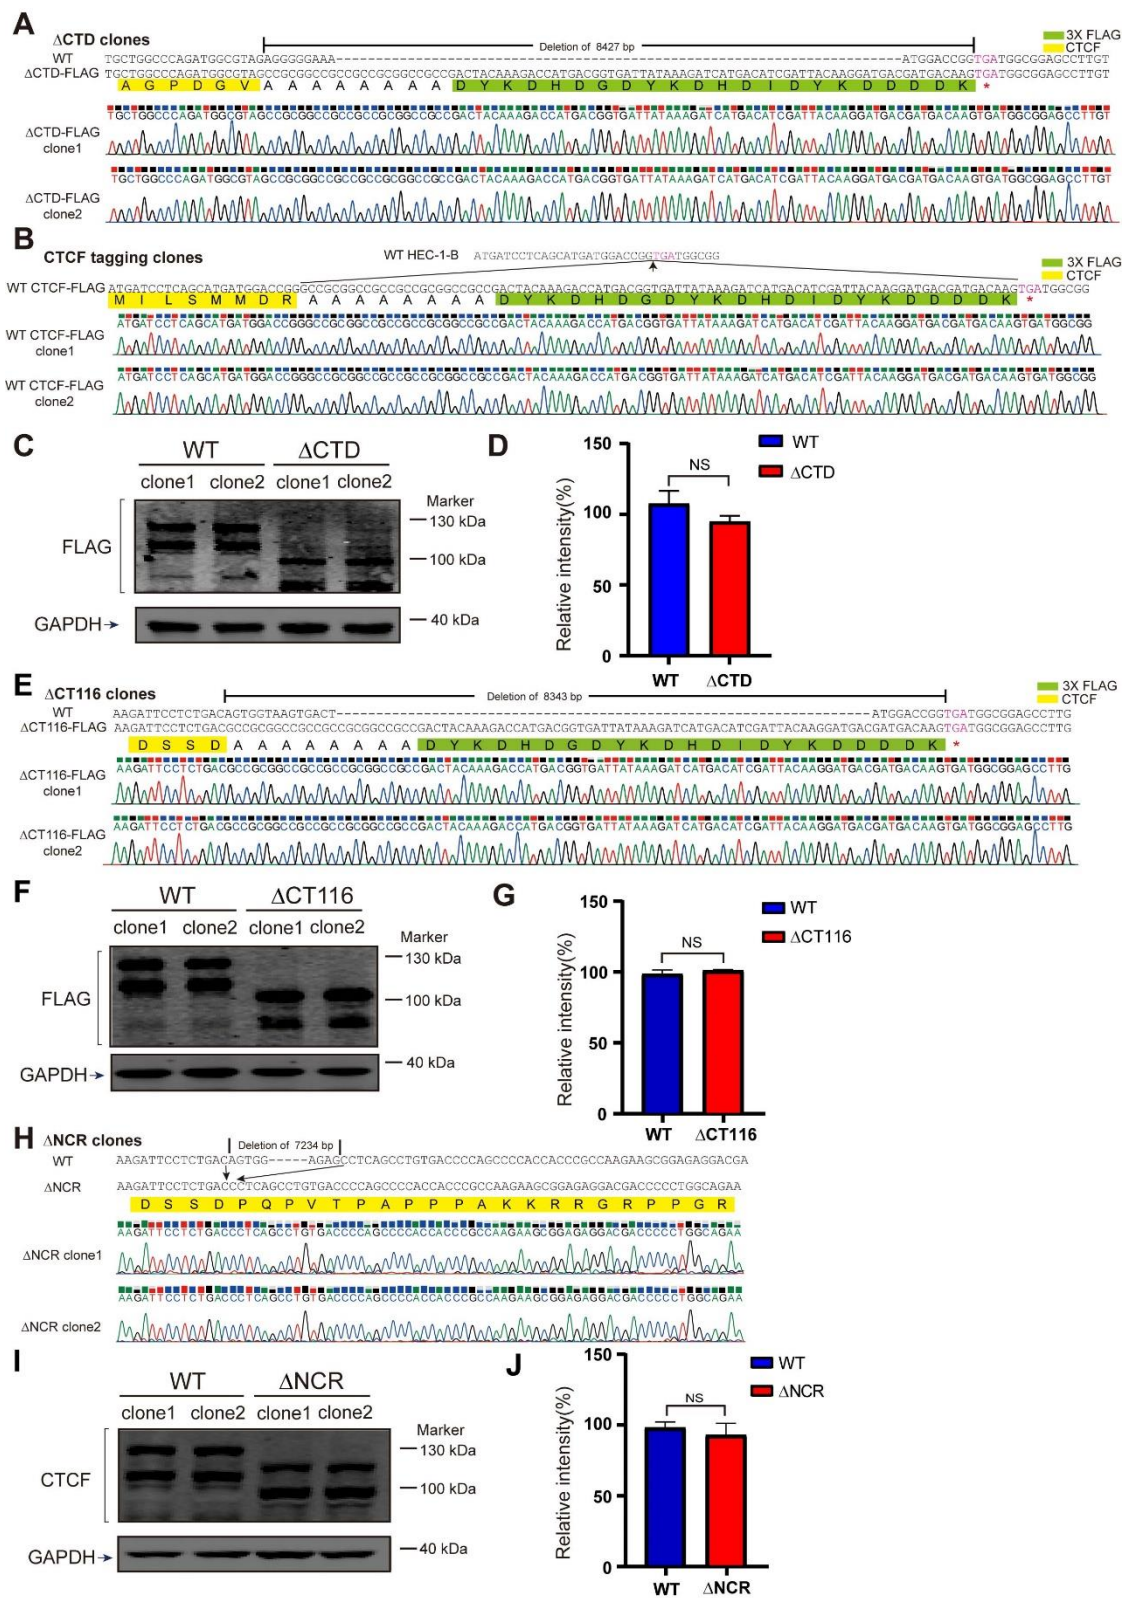

**Figure S1. Genotyping and Western blots of single-cell CRISPR clones of CTD, CT116, or NCR deletion as well as wild-type CTCF FLAG-tagging cell clones. Related to Figures 1, 2, and 4.**

(A-D) Genotyping of the two  $\Delta$ CTD-FLAG (A), WT-FLAG (B) single-cell clones by Sanger sequencing, and their Western blots (C) with quantification (D). (E-G) Genotyping of the two  $\Delta$ CT116-FLAG single-cell clones (E) by Sanger sequencing, and their Western blots (F) with quantification (G). (H-J) Genotyping of the two  $\Delta$ NCR single-cell clones (H) by Sanger sequencing, and their Western blots (I) with quantification (J). Data are presented as mean  $\pm$  SD. Student's *t* test, NS,  $p > 0.05$ .

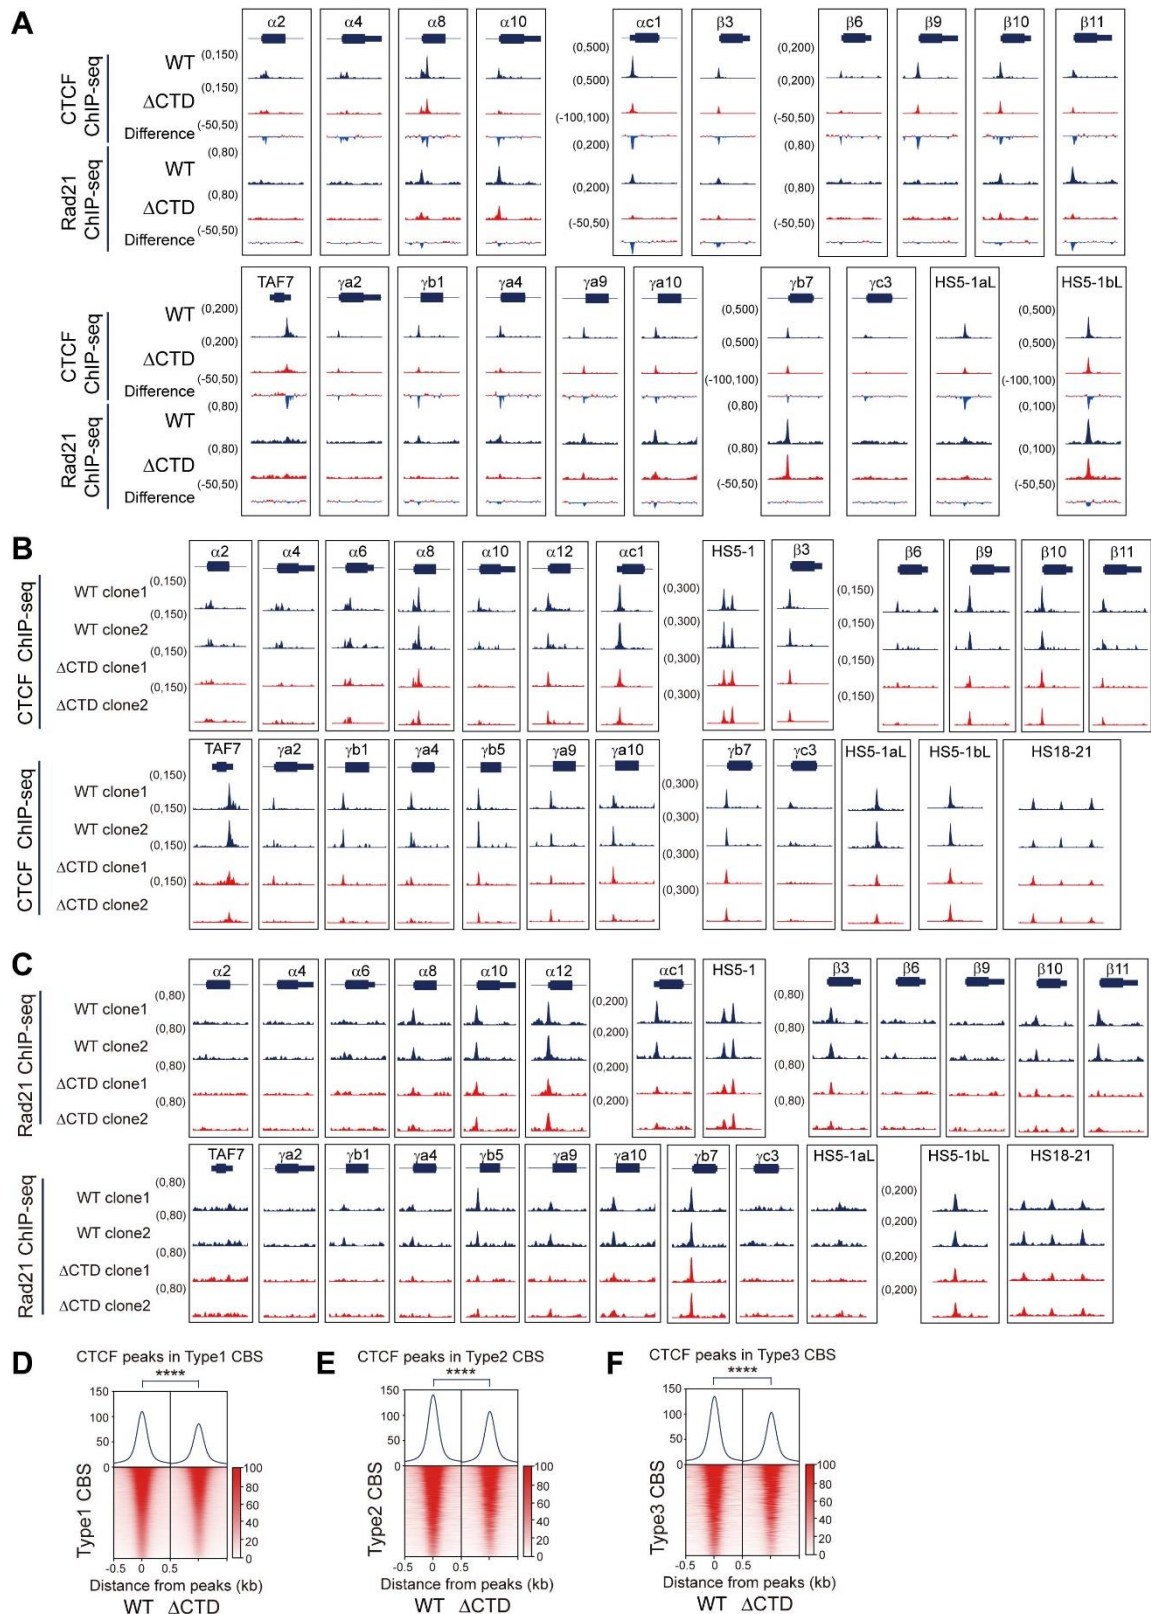

**Figure S2. CTCF and Rad21 ChIP-seq profiles in  $\Delta$ CTD and WT cells. Related to Figure 1.**

(A) CTCF and Rad21 ChIP-seq profiles for WT and  $\Delta$ CTD cells at the *cPCDH* locus, indicating decreased CTCF binding upon CTD deletion. (B and C) CTCF (B) or Rad21 (C) ChIP-seq profiles for the two single-cell clones of WT or  $\Delta$ CTD at the *cPCDH* locus. (D-F) Heatmaps of CTCF ChIP-seq signals at the three types of CTCF motifs upon CTD deletion. Student's *t* test, \*\*\*\* $p < 0.0001$ .

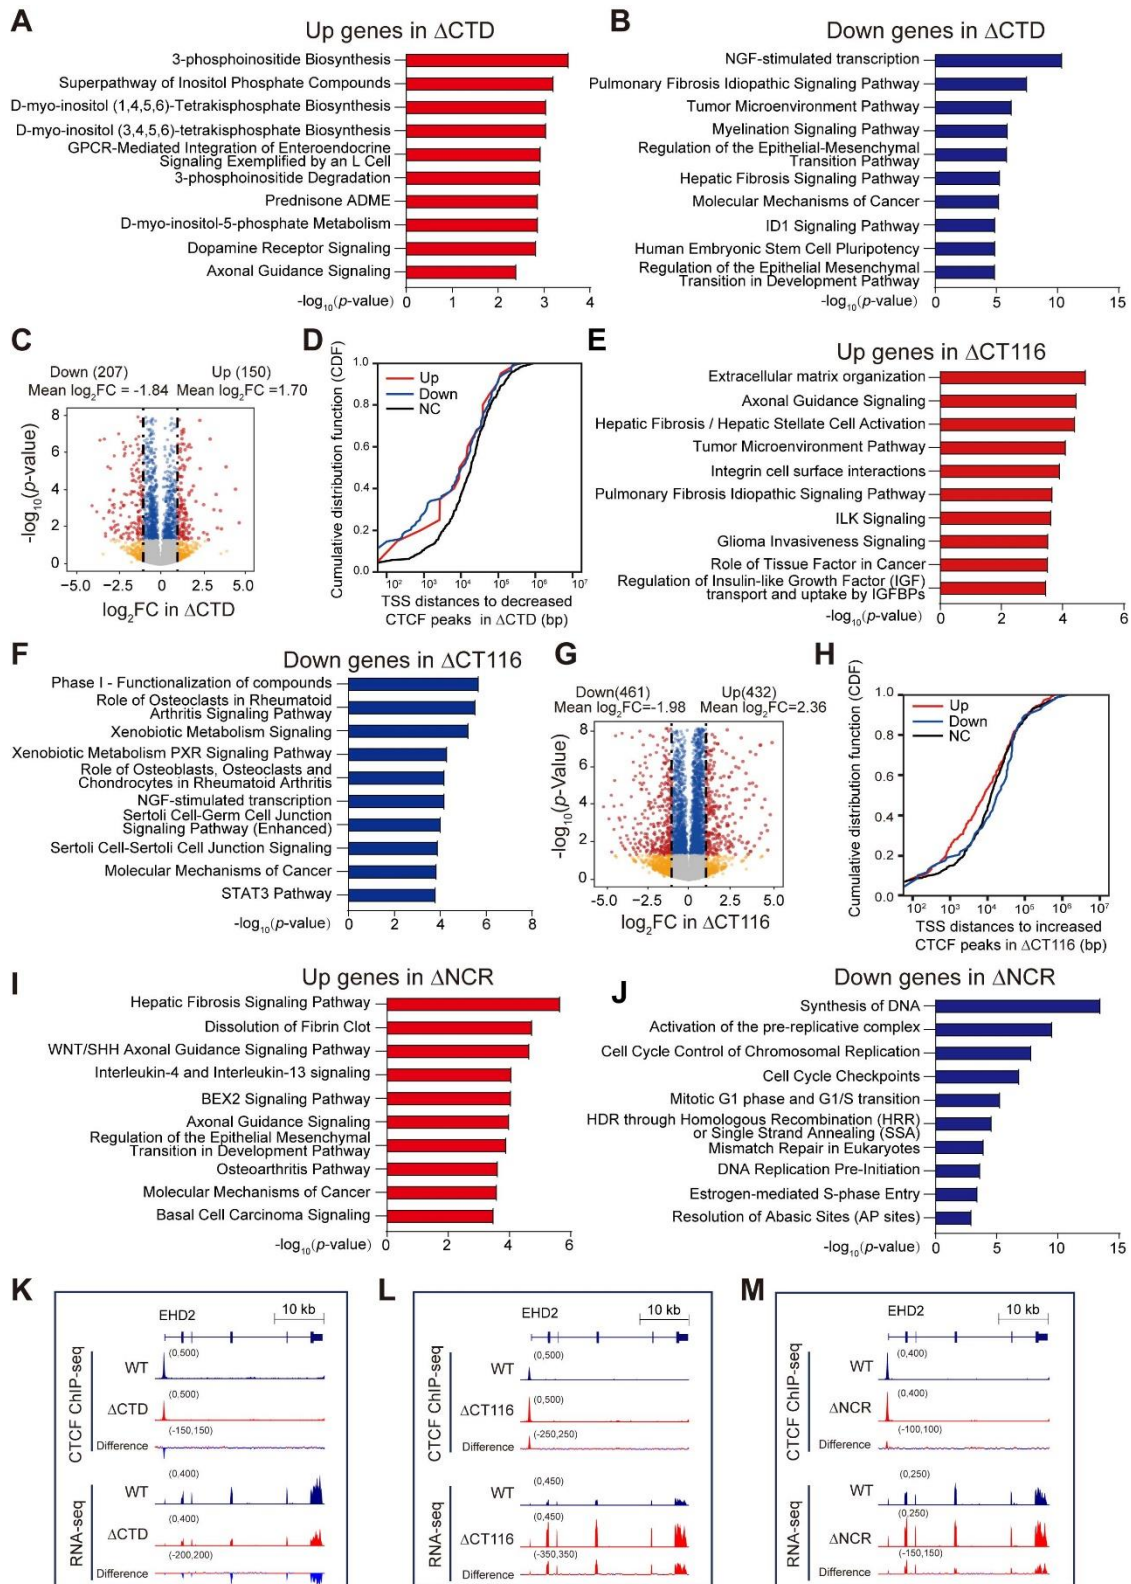

**Figure S3. RNA-seq of  $\Delta$ CTD,  $\Delta$ CT116,  $\Delta$ NCR cell clones. Related to Figures 1, 2, and 4.**

(A and B) Ingenuity pathway analysis (IPA) of up- (A) and down- (B) regulated genes upon CTD deletion. (C) Volcano plots of differential gene expression analyses upon  $\Delta$ CTD deletion. Red dots, gene expression changed upon CTD deletion ( $\log_2$ FC > 1 and adjusted  $p$  value < 0.05). Blue dots, genes only passed adjusted  $p$  value < 0.05. Yellow dots, gene only passed  $\log_2$ FC > 1. (D) TSS distances of up-, down-, or none-regulated (NC) genes to the closest decreased CTCF peaks in  $\Delta$ CTD cells (data were shown as a cumulative distribution function, CDF). (E and F) IPA analyses of up- (E) and down- (F) regulated genes in  $\Delta$ CT116 cells. (G) Volcano plots of differential gene expression analyses of WT and  $\Delta$ CT116 cells. (H) TSS distances of up-, down-, or none-regulated (NC) genes to the closest increased CTCF peaks in  $\Delta$ CT116 cells (data were shown as a cumulative distribution function, CDF). (I and J) IPA analyses of up- (I) and down- (J) regulated genes upon NCR deletion. (K-M) Altered CTCF binding and gene expression levels at the *EHD2* locus in  $\Delta$ CTD (K),  $\Delta$ CT116 (L), and  $\Delta$ NCR (M) cell lines.

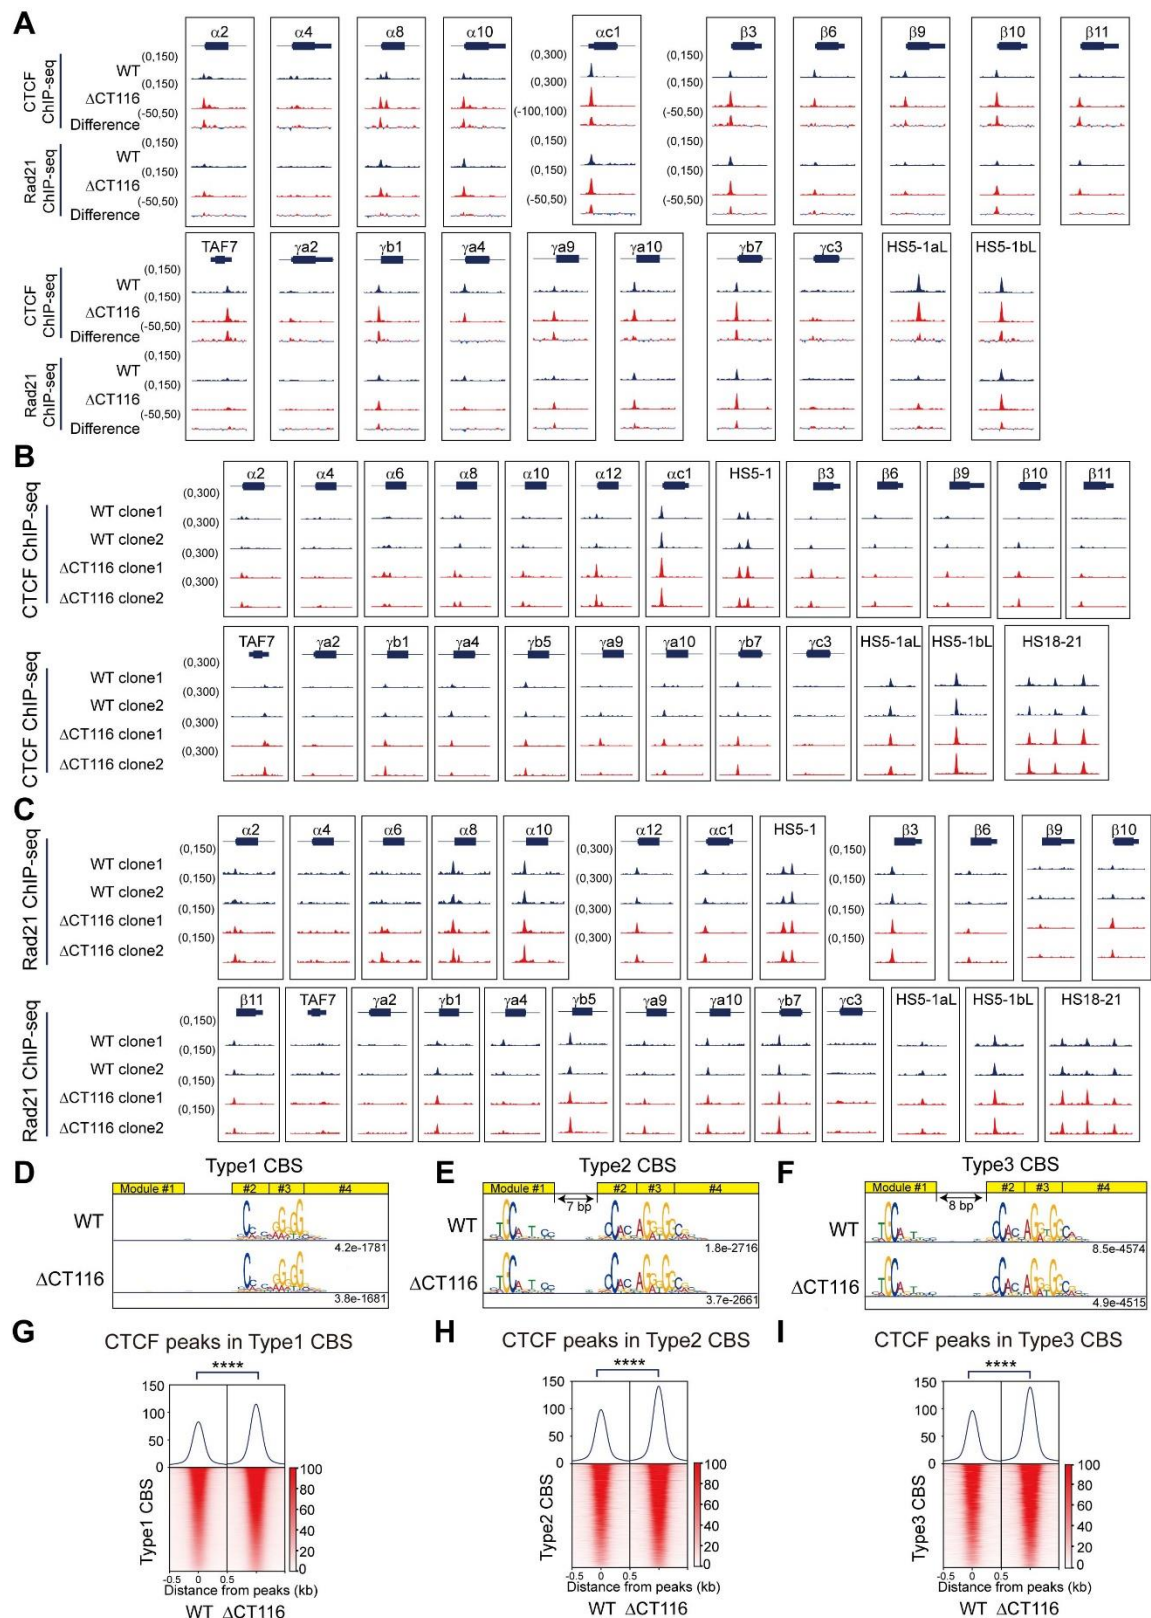

**Figure S4. CTCF and Rad21 ChIP-seq profiles in  $\Delta$ CT116 and WT cells. Related to Figure 2.**

(A) CTCF and Rad21 ChIP-seq profiles of WT and  $\Delta$ CT116 cells at the *cPCDH* locus, showing increased CTCF binding in  $\Delta$ CT116 cells. (B and C) CTCF (B) or Rad21 (C) ChIP-seq profiles of the two single-cell clones of WT and  $\Delta$ CT116 at the *cPCDH* locus. (D-F) Three types of CTCF motifs of WT and  $\Delta$ CT116 cells. (G-I) Heatmaps of CTCF ChIP-seq signals at the three types of CTCF motifs of WT and  $\Delta$ CT116 cells. Student's *t* test, \*\*\*\*  $p < 0.0001$ .

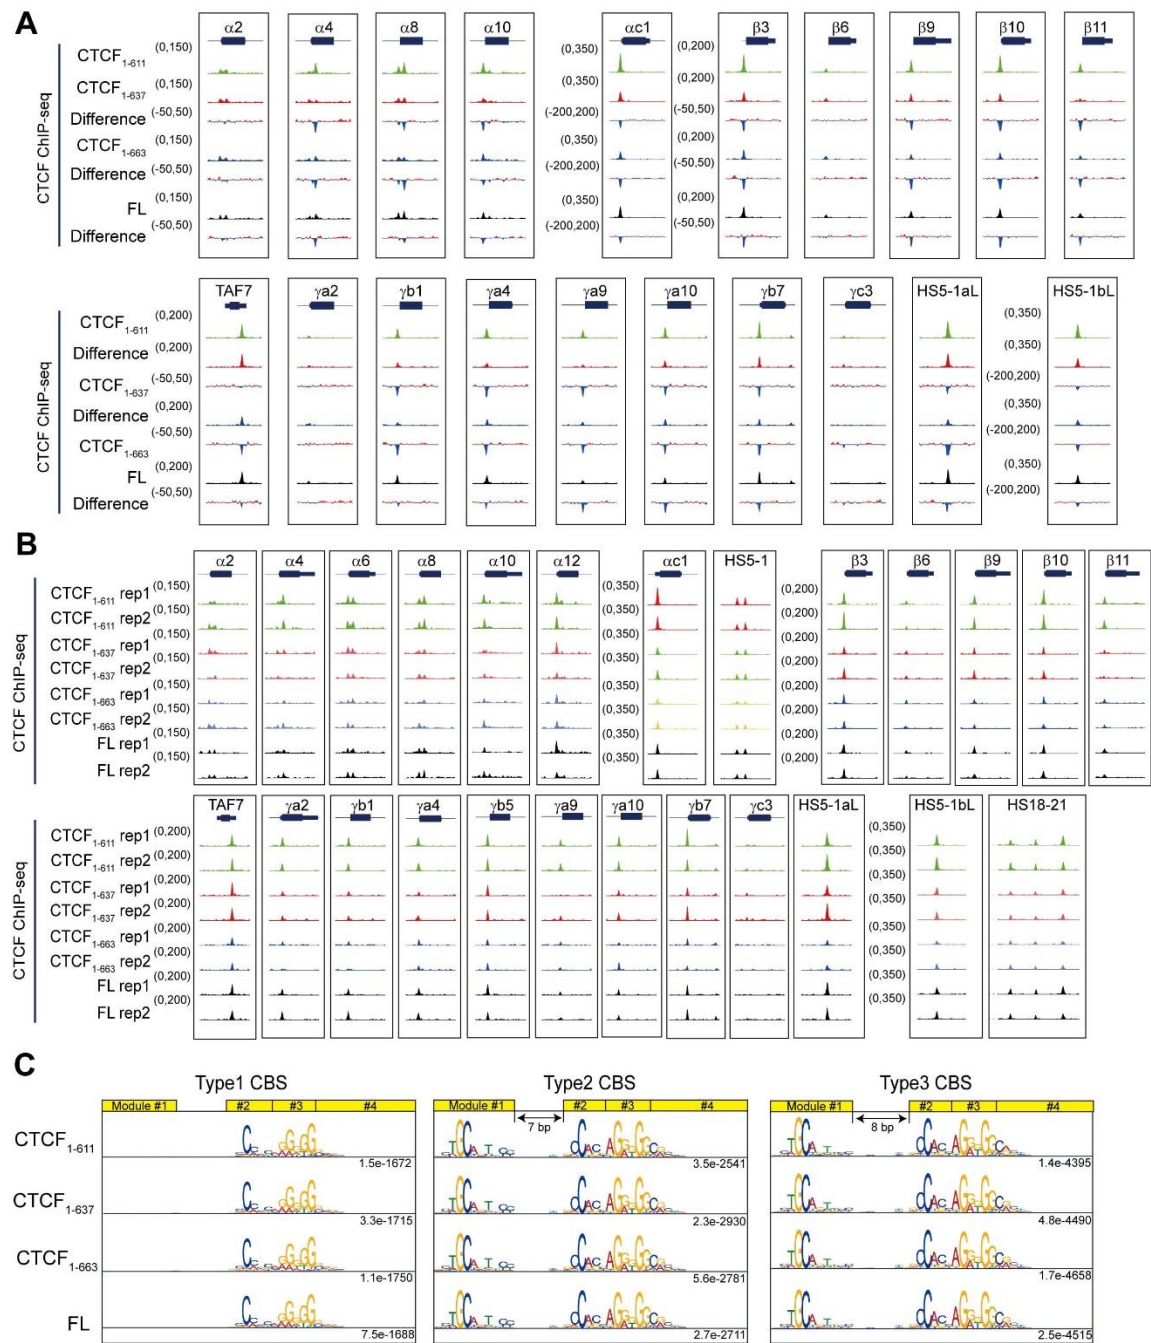

**Figure S5. ChIP-seq profiles of a series of truncated CTCF proteins. Related to Figure 3.**

(A) ChIP-seq of different truncated CTCF proteins at the *cPCDH* locus, indicating that CTCF<sub>1-611</sub> has the highest binding strength. (B) Biological replicates of ChIP-seq experiments with truncated CTCF proteins. (C) Motif analyses of truncated CTCF proteins, showing no alteration of the three types of CTCF motifs.

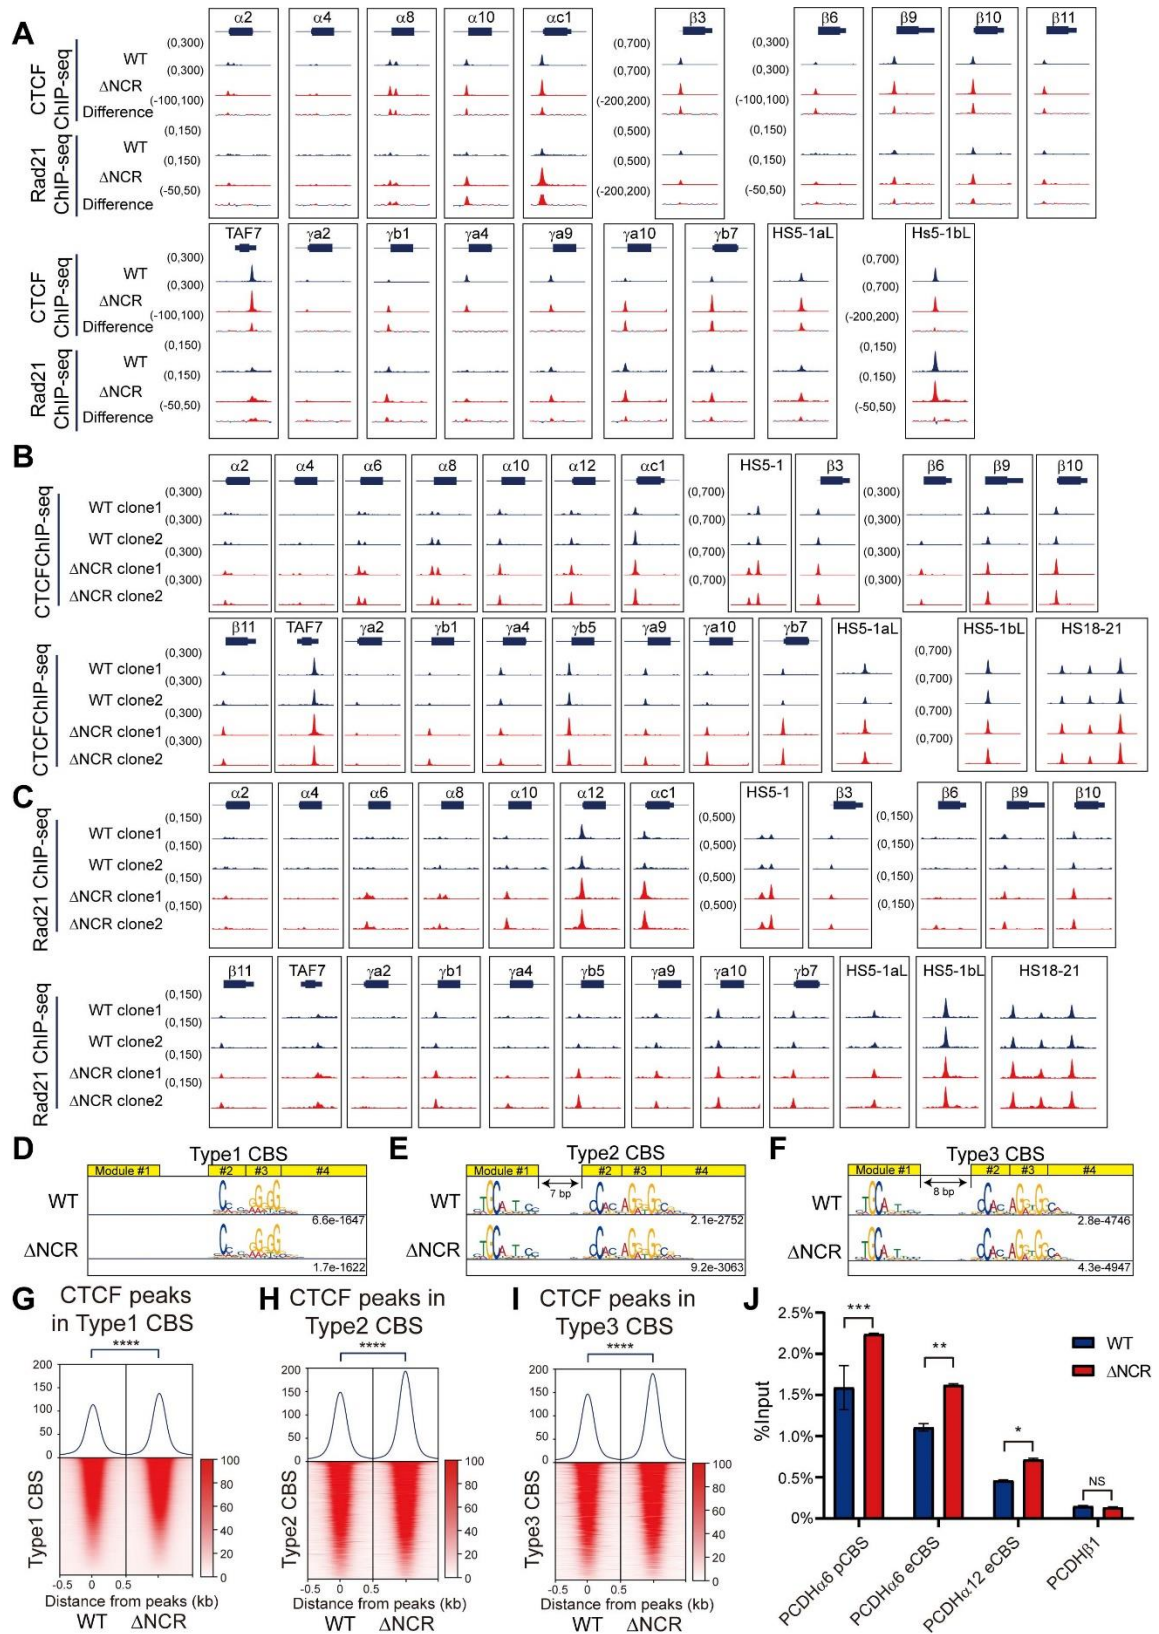

**Figure S6. CTCF and Rad21 ChIP-seq profiles upon NCR deletion. Related to Figure 4.**

(A) CTCF and Rad21 ChIP-seq profiles at the *cPCDH* gene complex upon NCR deletion. (B and C) CTCF (B) or Rad21 (C) ChIP-seq profiles of the two single-cell clones of WT and  $\Delta$ NCR at the *cPCDH* locus. (D-F) Three types of CTCF motifs upon NCR deletion. (G-I) Heatmaps of CTCF ChIP-seq signals at the three types of CTCF motifs upon NCR deletion. Student's *t* test, \*\*\*\* $p < 0.0001$ . (J) CTCF ChIP-qPCR at three different CBS elements (*PCDH* $\alpha$ 6 pCBS, *PCDH* $\alpha$ 6 eCBS and *PCDH* $\alpha$ 12 eCBS) and a negative control (*PCDH* $\beta$ 1) using WT and  $\Delta$ NCR cell lines. Data are presented as mean  $\pm$  SD. Student's *t* test, \*\*\* $p < 0.001$ , \*\* $p < 0.01$ , NS,  $p > 0.05$

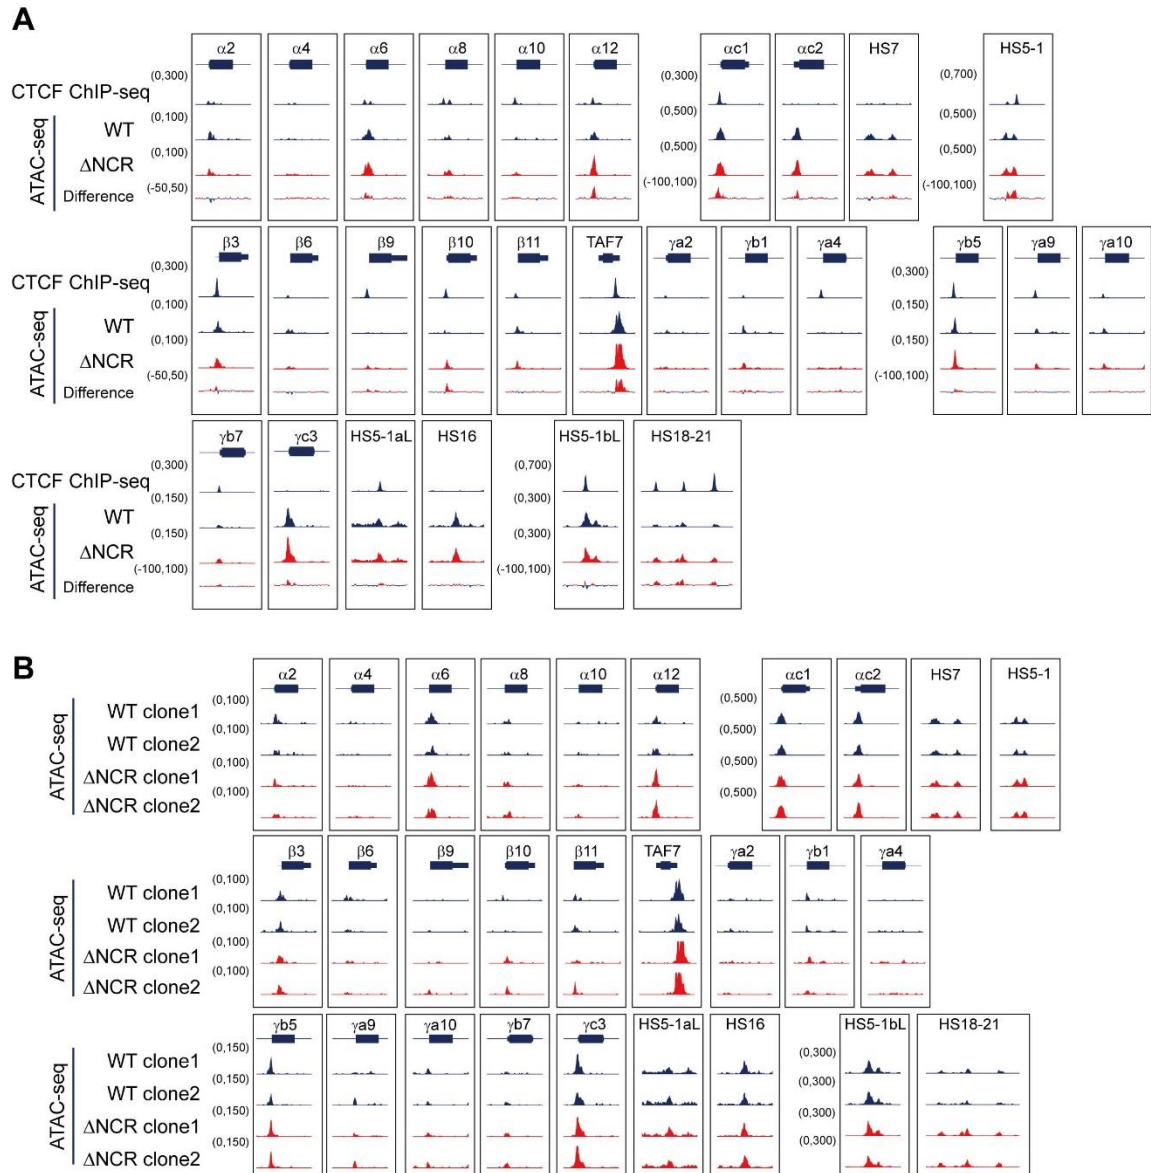

**Figure S7. ATAC-seq profiles upon NCR deletion. Related to Figure 4.**

(A) ATAC-seq profiles at the *cPCDH* gene complex. (B) ATAC-seq profiles of the two single-cell clones of WT and  $\Delta$ NCR at the *cPCDH* gene complex.



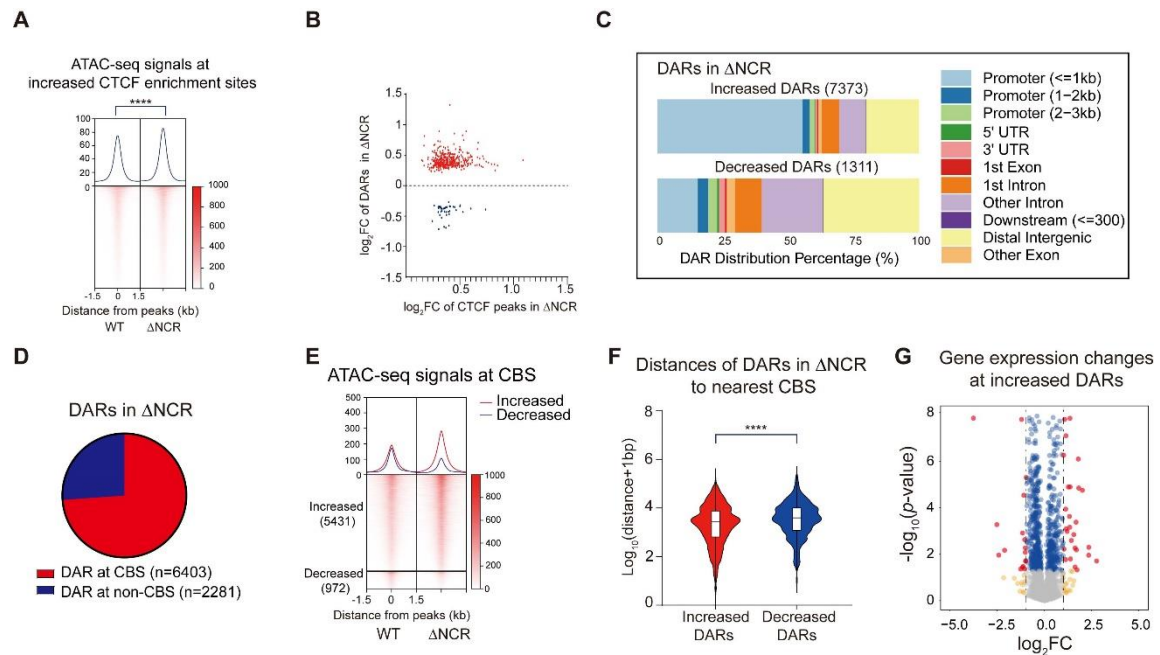

**Figure S8 Deletion of NCR rewires chromatin accessibility. Related to Figure 4.**

(A) Heatmaps of ATAC-seq signals at sites with increased CTCF enrichments, indicating increased chromatin accessibility upon NCR deletion. Student's  $t$  test, \*\*\*\*  $p < 0.0001$ . (B) Scatter plots shows the  $\log_2$ FC of increased CTCF enrichments (x axis) and the corresponding  $\log_2$ FC of DARs (y axis) upon NCR deletion. (C) Distributions of increased and decreased DARs with gene elements upon NCR deletion. (D) Distribution of DARs in term of whether overlapping with CBS elements. (E) Heatmaps of DARs overlapped with CBS elements. (F) Violin plots of  $\log_{10}(\text{distance}+1\text{bp})$  distribution of increased and decreased DARs to the nearest CBS element upon NCR deletion, showing that increased chromatin accessible regions are closer to CBS elements. Student's  $t$  test, \*\*\*\*  $p < 0.0001$  (G) Volcano plots showing that increased DARs are associated with more up-regulated genes upon NCR deletion.
